# Supplementary material
Source: publisher figshare collection journal article supplement (https://acs.figshare.com/ndownloader/files/28550146)
Supplement: Supplementary file 1 [file 28550146]

Supporting Information:

**Magnetically Induced Ring-Current Strengths of Planar  
and Nonplanar Molecules: New Insights from The Pseudo-  
 $\pi$  Model**

Mesías Orozco-Ic,<sup>\*,†</sup> Maria Dimitrova,<sup>‡</sup> Jorge Barroso,<sup>†</sup> Dage Sundholm,<sup>\*,‡</sup> and Gabriel Merino,<sup>\*,†</sup>

<sup>†</sup>*Departamento de Física Aplicada, Centro de Investigación y de Estudios Avanzados, Unidad Mérida. Km 6 Antigua Carretera a Progreso. Apdo. Postal 73, Cordemex, 97310, Mérida, Yuc., México.*

<sup>‡</sup>*Department of Chemistry, Faculty of Science, University of Helsinki, P.O. Box 55, A. I. Virtasen aukio 1, FIN-00014 Helsinki, Finland.*

Corresponding Authors

\*E-mail: mesias.orozco@cinvestav.mx (M.O.-I.).

\*E-mail: dage.sundholm@helsinki.fi (D.S.)

\*E-mail: gmerino@cinvestav.mx (G.M.)

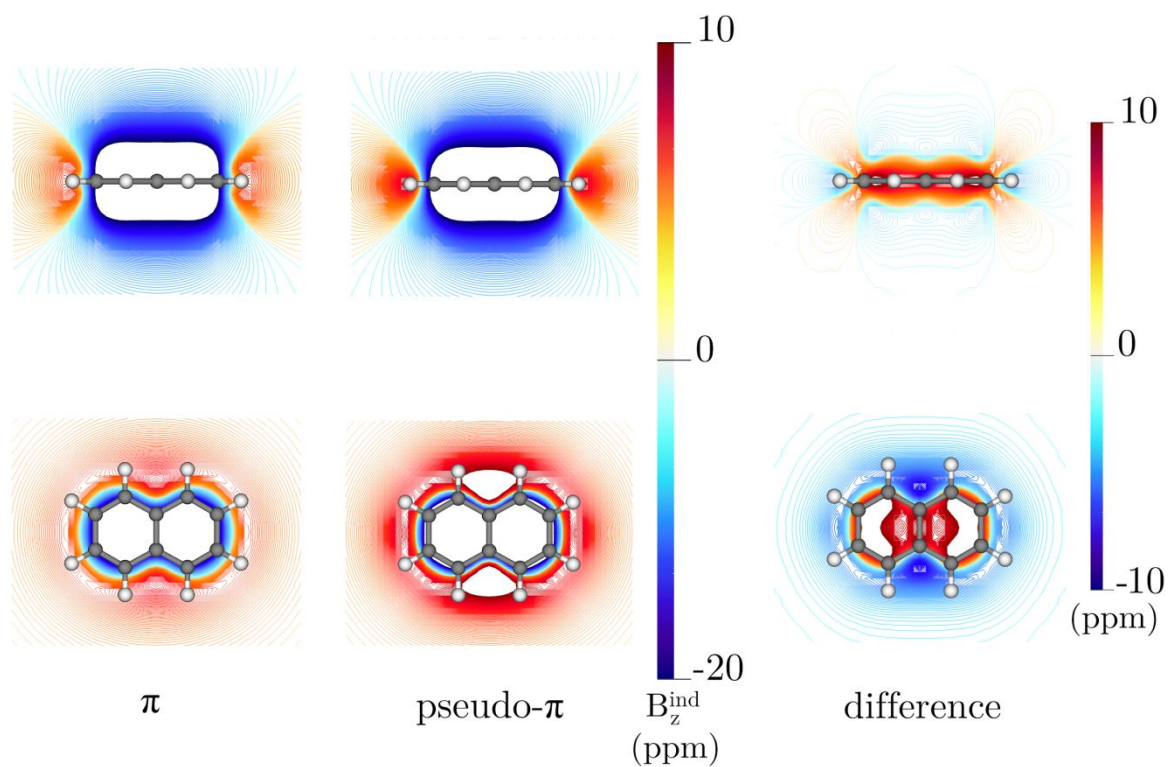

**Figure S1.** Comparison of the true  $\pi$ -component of  $B_z^{\text{ind}}$  (left), the pseudo- $\pi$  modeled (in the middle), and the difference resulting from subtracting the pseudo- $\pi$  model computations from the true  $\pi$ -component computed in the same grid (right) for naphthalene. The true  $\pi$ -component can be computed using the Nuclear Chemical Shielding (NCS) analysis, which allows to dissect the shielding tensor into its molecular orbital components.

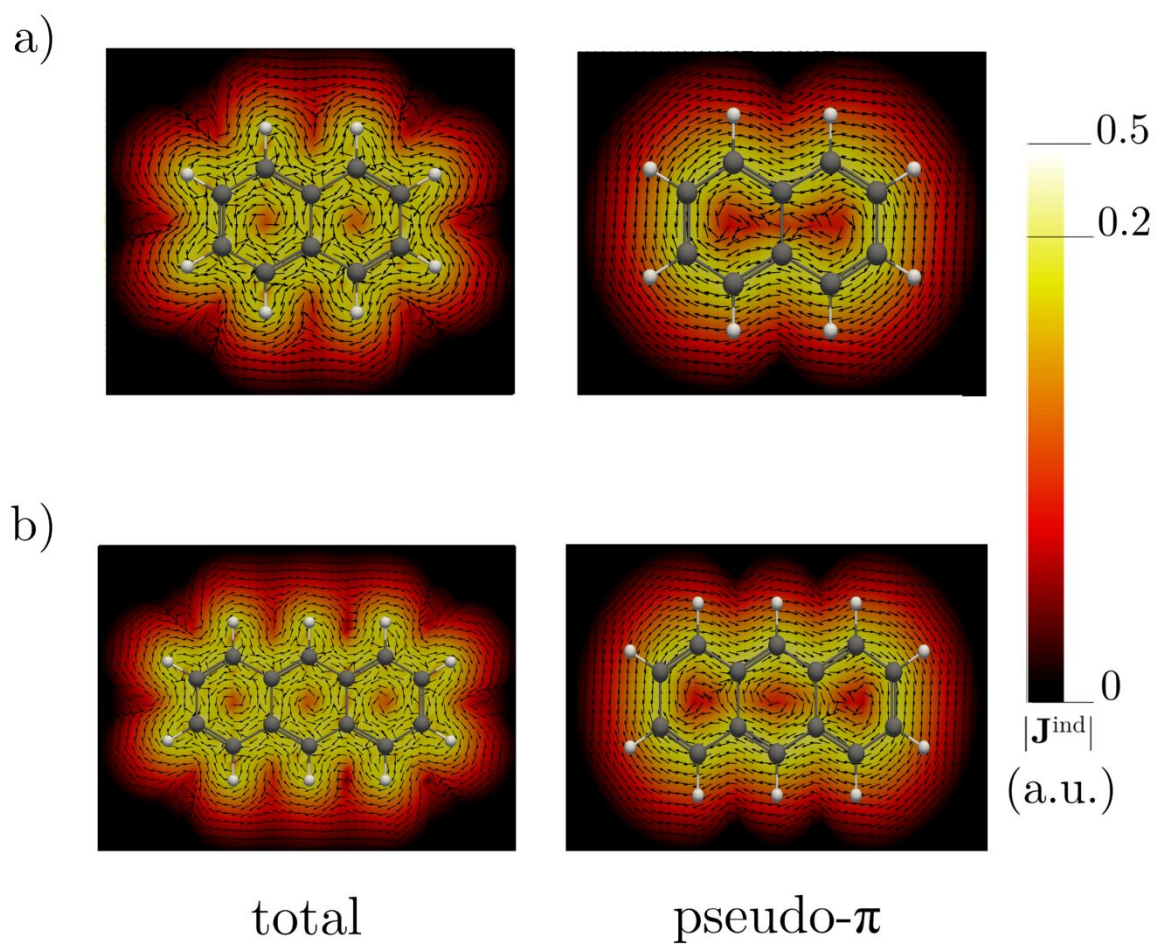

**Figure S2.** The total  $\mathbf{J}^{\text{ind}}$  (left) and the pseudo- $\pi$  contribution to  $\mathbf{J}^{\text{ind}}$  (right) computed in the molecular plane of a) naphthalene and b) anthracene. The arrows show the direction of the current density. The  $|\mathbf{J}^{\text{ind}}|$  scale is given in atomic units (1 a.u. = 100.63 nA/T/Å<sup>2</sup>).

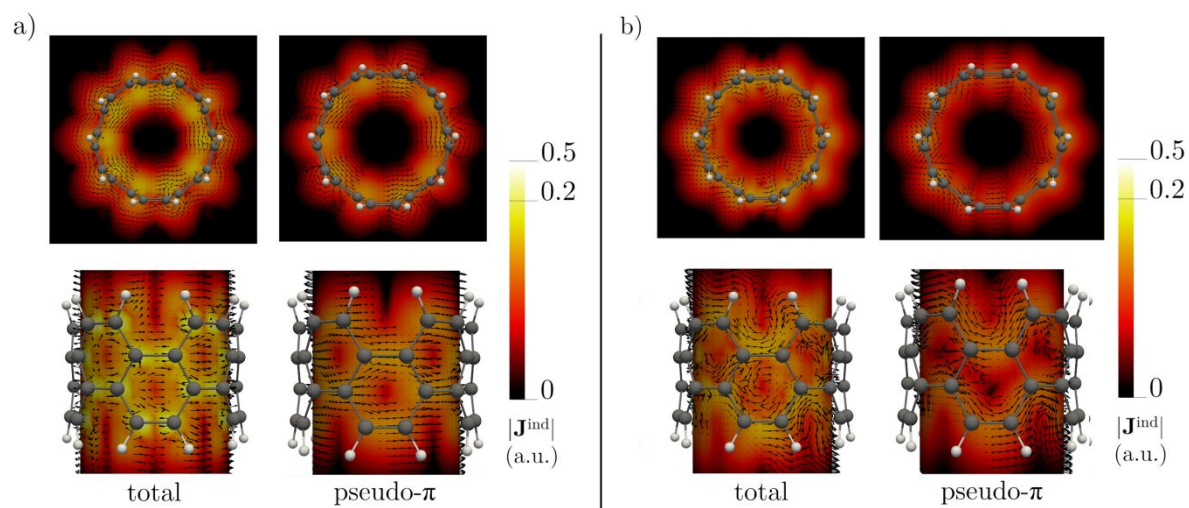

**Figure S3.** a) The total (left) and the pseudo- $\pi$  modeled (right)  $\mathbf{J}^{\text{ind}}$  computed in a perpendicular plane (top) to the external field and in a cylindrical plane (bottom) for [10]cyclophenacene. The external field is parallel to the belt axis ( $z$ -axis). b) The total (left) and the pseudo- $\pi$  modeled (right)  $\mathbf{J}^{\text{ind}}$  calculated in a perpendicular plane (top) to the external field and in a cylindrical plane (bottom) for [10]cyclophenacene. The external field is perpendicular to the belt axis ( $y$ -axis). The arrows show the direction of the current density. The  $|\mathbf{J}^{\text{ind}}|$  scale is given in atomic units (1 a.u. = 100.63 nA/T/Å<sup>2</sup>).



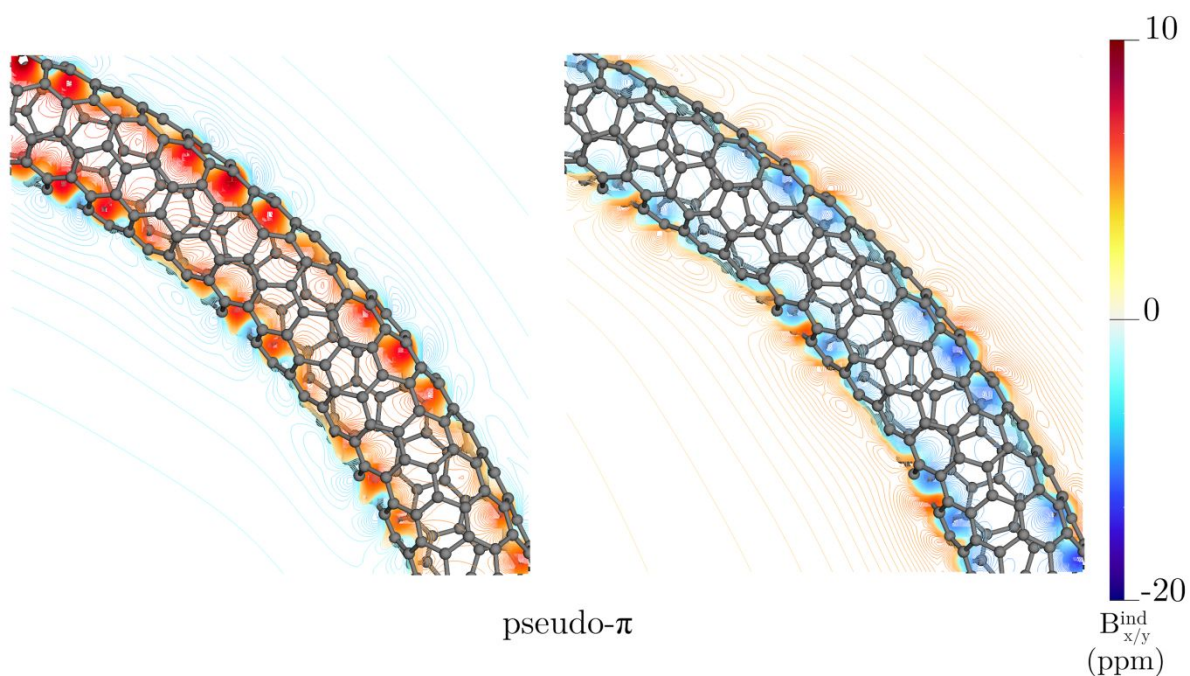

**Figure S4.** Isosurfaces of the  $x$ - (left) and  $y$ -component (right) of the induced magnetic field using the pseudo- $\pi$  model computed in a molecular plane for  $C_{2016}$ . The magnetic field is parallel to the toroidal axis.

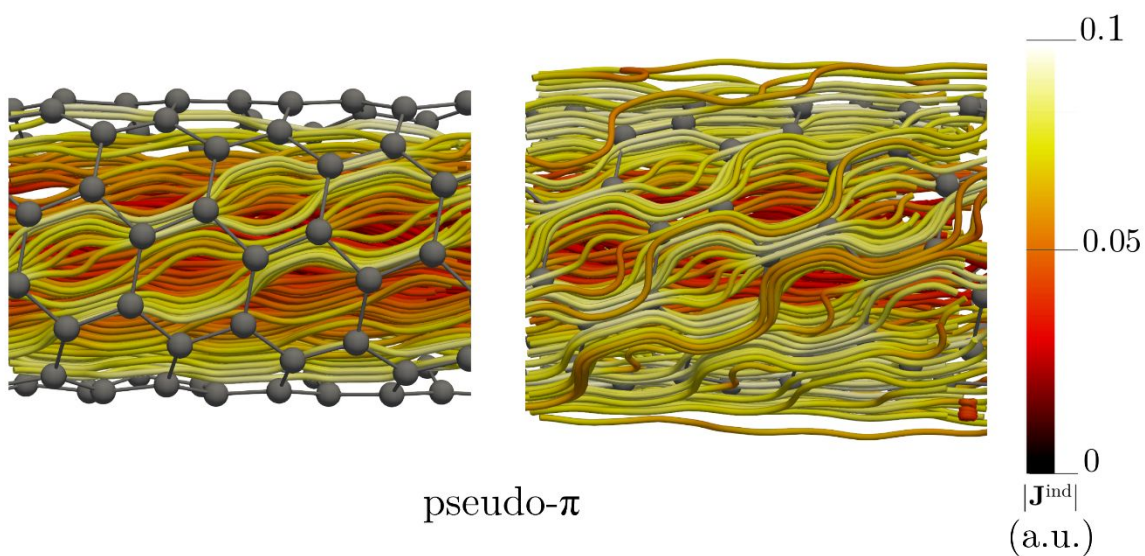

**Figure S5.** Streamlines representation of  $\mathbf{J}^{\text{ind}}$  showing the currents pathways flowing diatropically outside (left) and inside (right) of the surface of the toroidal carbon nanotube ( $C_{2196}$ ) using the pseudo- $\pi$  model. The external field is parallel to the main axis of the torus.

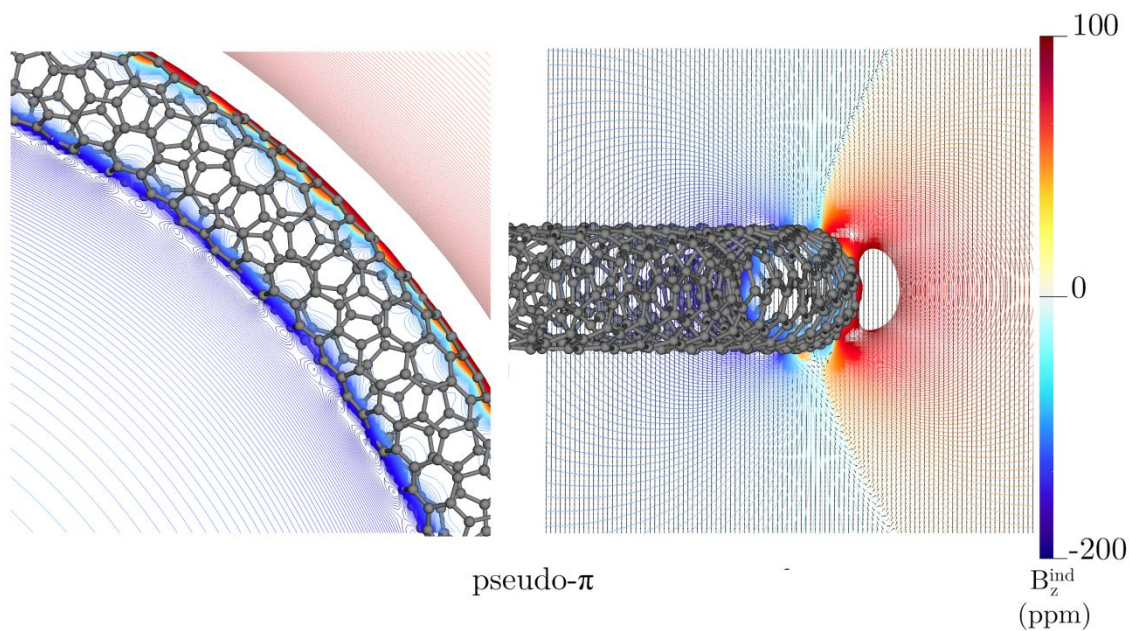

**Figure S6.** The induced magnetic field ( $\mathbf{B}^{\text{ind}}$ ) computed with the pseudo- $\pi$  model (right) in a molecular plane (left) and a perpendicular plane (right) for  $\text{C}_{2196}$ . The arrows show the direction of  $\mathbf{B}^{\text{ind}}$ , while the color scale denotes the strength of the  $z$ -component of the magnetic field. The magnetic field is parallel to the toroidal axis.
